# Supplementary material for: Green Synthesis of Gold and Silver Nanoparticles Using Leaf Extract of Clerodendrum inerme; Characterization, Antimicrobial, and Antioxidant Activities
Source: MDPI journal article supplement (doi:10.3390/biom10060835), 2020-05-29
Supplement: s1 [file s1]

## Supplementary Material

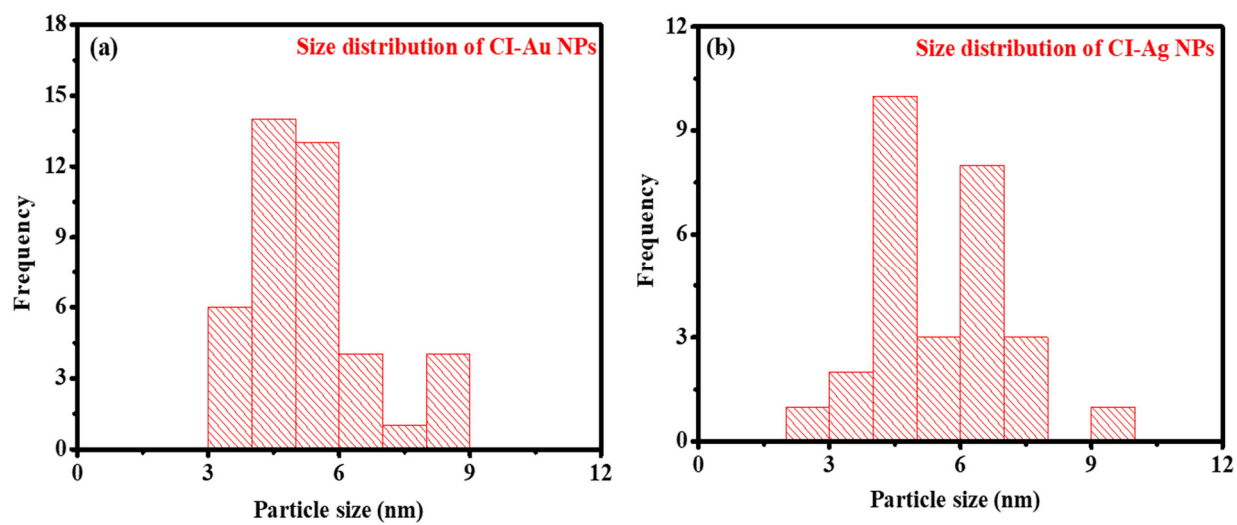

**Figure S1.** The particle size distribution histogram of green synthesized (a) CI-Au and (b) CI Ag NPs from TEM.

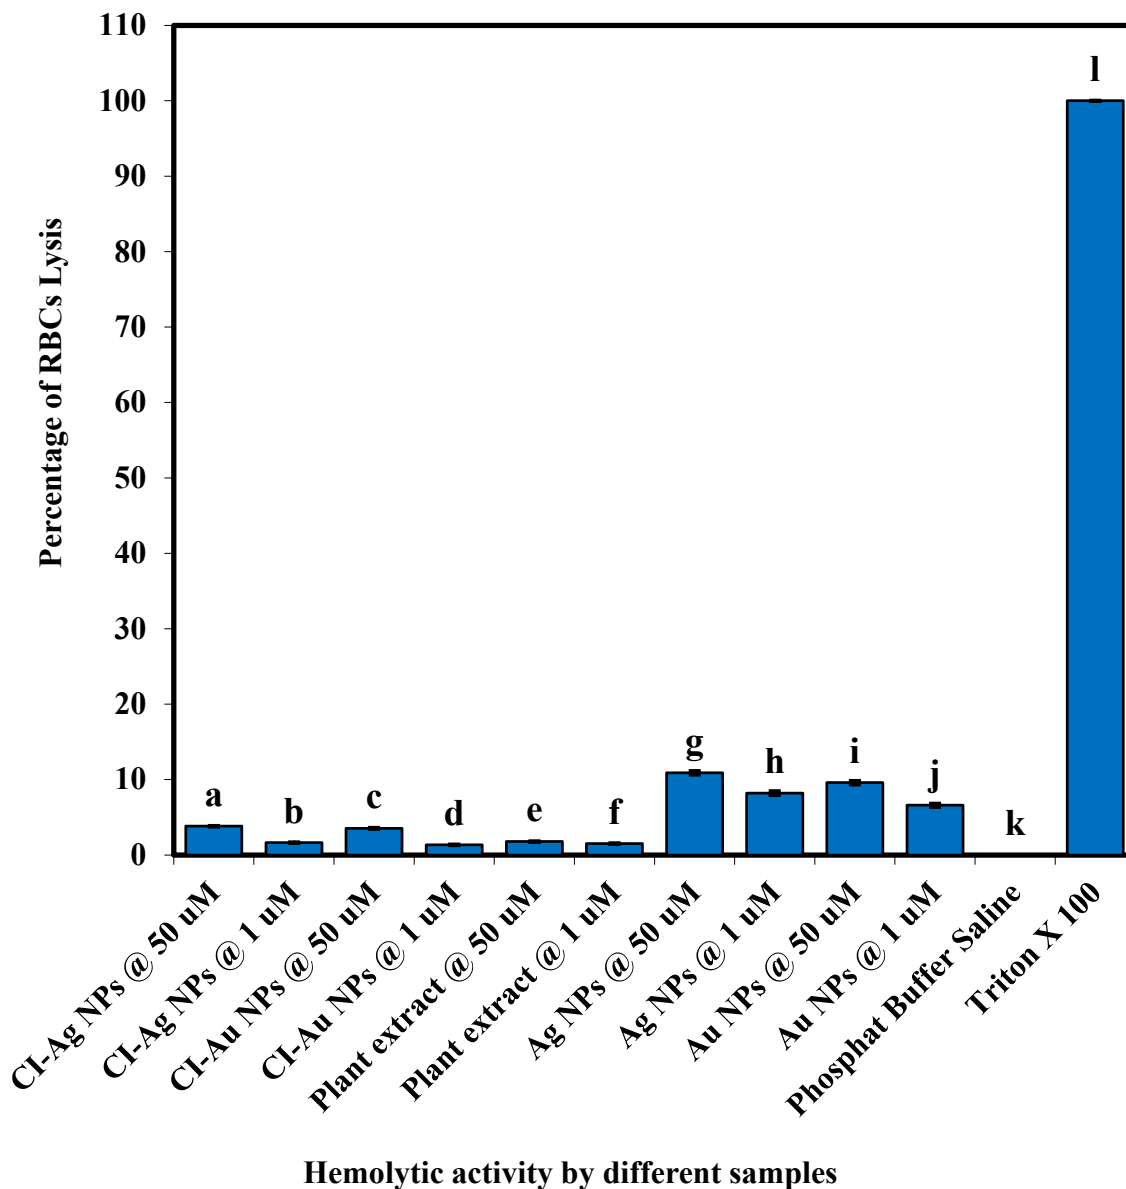

**Figure S2.** Hemolysis activity of different concentrations of green synthesized CI-Au and CI-Ag NPs in comparison to *C. inermis* leaves extract, Au NPs, and Ag NPs. (Note; Tukey based heterogeneous lower-case letters represent significant statistical pairs)
